# Supplementary material
Source: PubMed Central journal article supplement (PMC7687796)
Supplement: 13048_2020_734_MOESM2_ESM.pdf [file 13048_2020_734_MOESM2_ESM.pdf]

Incidence, clinical features, and outcomes of COVID-19 in Canada: Impact of sex and age

Jacob O'Brien<sup>1</sup>, Kevin Du<sup>1</sup>, and Chun Peng<sup>1,2\*</sup>

<sup>1</sup>Department of Biology, York University, Toronto, Canada

<sup>2</sup>Centre for Research in Biomolecular Interactions, York University, Toronto, ON, Canada

**\* Correspondence:**

Dr. Chun Peng

[cpeng@yorku.ca](mailto:cpeng@yorku.ca)

A

| CanData         |                      |                       |       |
|-----------------|----------------------|-----------------------|-------|
| 2932509x3 table |                      |                       |       |
|                 | 1                    | 2                     | 3     |
|                 | CaseldentifierNumber | Caselnformation       | Value |
| 1               | 1                    | 'Region'              | 2     |
| 2               | 1                    | 'Episode_week'        | 17    |
| 3               | 1                    | 'Episode_week_gro...  | 0     |
| 4               | 1                    | 'Episode_year'        | 20    |
| 5               | 1                    | 'Gender'              | 2     |
| 6               | 1                    | 'Age_group'           | 8     |
| 7               | 1                    | 'Occupation'          | 4     |
| 8               | 1                    | 'Asymptomatic'        | 9     |
| 9               | 1                    | 'Onset_week_of_sy...  | 99    |
| 10              | 1                    | 'Onset_year_of_sym... | 99    |
| 11              | 1                    | 'Symptom_cough'       | 9     |
| 12              | 1                    | 'Symptom_fever'       | 9     |
| 13              | 1                    | 'Symptom_chills'      | 9     |
| 14              | 1                    | 'Symptom_sore_thr...  | 9     |
| 15              | 1                    | 'Symptom_runny_n...   | 9     |

B

| CanPop      |     |          |          |          |
|-------------|-----|----------|----------|----------|
| 102x4 table |     |          |          |          |
|             | 1   | 2        | 3        | 4        |
|             | Age | Total    | Male     | Female   |
| 1           | -1  | 37589262 | 18678085 | 18911177 |
| 2           | 0   | 381716   | 195851   | 185865   |
| 3           | 1   | 381655   | 195516   | 186139   |
| 4           | 2   | 386542   | 198435   | 188107   |
| 5           | 3   | 394889   | 202187   | 192702   |
| 6           | 4   | 398373   | 204180   | 194193   |
| 7           | 5   | 401761   | 205366   | 196395   |
| 8           | 6   | 405905   | 208006   | 197899   |
| 9           | 7   | 408230   | 208483   | 199747   |
| 10          | 8   | 407905   | 208375   | 199530   |
| 11          | 9   | 415551   | 211776   | 203775   |
| 12          | 10  | 417389   | 212892   | 204497   |
| 13          | 11  | 417066   | 212116   | 204950   |
| 14          | 12  | 406889   | 207072   | 199817   |
| 15          | 13  | 397226   | 202088   | 195138   |

C

| CanWork         |                                    |             |                    |               |               |               |                 |                                             |                    |                    |                     |                          |                        |
|-----------------|------------------------------------|-------------|--------------------|---------------|---------------|---------------|-----------------|---------------------------------------------|--------------------|--------------------|---------------------|--------------------------|------------------------|
| 405405x13 table |                                    |             |                    |               |               |               |                 |                                             |                    |                    |                     |                          |                        |
|                 | 1                                  | 2           | 3                  | 4             | 5             | 6             | 7               | 8                                           | 9                  | 10                 | 11                  | 12                       | 13                     |
|                 | DIM_HighestCertificate_Diplon      | MemberID_Hi | Notes_HighestCerti | DIM_Age_13A_  | MemberID_Age_ | DIM_Sex_3_    | MemberID_Sex_3_ | DIM_Occupation_NationalOccupationalClz      | MemberID_Occupatio | Notes_Occupation_N | Dim_LabourForceStat | Dim_LabourForceStatus_3_ | Dim_LabourForceStatus_ |
| 1               | 'Total - Highest certificate, d... | 1           | 1                  | 'Total - Age' | 1             | 'Total - Sex' | 1               | 'Total - Occupation - National Occupati...  | 1                  | 6                  | 18672470            | 17230040                 | 1442435                |
| 2               | 'Total - Highest certificate, d... | 1           | 1                  | 'Total - Age' | 1             | 'Total - Sex' | 1               | 'Occupation - Not applicable'               | 2                  | 7                  | 404350              | 0                        | 404350                 |
| 3               | 'Total - Highest certificate, d... | 1           | 1                  | 'Total - Age' | 1             | 'Total - Sex' | 1               | 'All occupations'                           | 3                  | 8                  | 18268120            | 17230035                 | 1038090                |
| 4               | 'Total - Highest certificate, d... | 1           | 1                  | 'Total - Age' | 1             | 'Total - Sex' | 1               | '0 Management occupations'                  | 4                  | NaN                | 2013365             | 1958780                  | 54585                  |
| 5               | 'Total - Highest certificate, d... | 1           | 1                  | 'Total - Age' | 1             | 'Total - Sex' | 1               | '00 Senior management occupations'          | 5                  | NaN                | 225385              | 221420                   | 3960                   |
| 6               | 'Total - Highest certificate, d... | 1           | 1                  | 'Total - Age' | 1             | 'Total - Sex' | 1               | '001 Legislators and senior management'     | 6                  | NaN                | 225380              | 221420                   | 3960                   |
| 7               | 'Total - Highest certificate, d... | 1           | 1                  | 'Total - Age' | 1             | 'Total - Sex' | 1               | '0011 Legislators'                          | 7                  | NaN                | 7810                | 7645                     | 170                    |
| 8               | 'Total - Highest certificate, d... | 1           | 1                  | 'Total - Age' | 1             | 'Total - Sex' | 1               | '0012 Senior government managers and ...    | 8                  | NaN                | 17490               | 17200                    | 285                    |
| 9               | 'Total - Highest certificate, d... | 1           | 1                  | 'Total - Age' | 1             | 'Total - Sex' | 1               | '0013 Senior managers - financial, com...   | 9                  | NaN                | 62610               | 61440                    | 1170                   |
| 10              | 'Total - Highest certificate, d... | 1           | 1                  | 'Total - Age' | 1             | 'Total - Sex' | 1               | '0014 Senior managers - health, educatio... | 10                 | NaN                | 26445               | 25815                    | 625                    |
| 11              | 'Total - Highest certificate, d... | 1           | 1                  | 'Total - Age' | 1             | 'Total - Sex' | 1               | '0015 Senior managers - trade, broadcast... | 11                 | NaN                | 51375               | 50505                    | 865                    |
| 12              | 'Total - Highest certificate, d... | 1           | 1                  | 'Total - Age' | 1             | 'Total - Sex' | 1               | '0016 Senior managers - construction, tr... | 12                 | NaN                | 59655               | 58810                    | 845                    |
| 13              | 'Total - Highest certificate, d... | 1           | 1                  | 'Total - Age' | 1             | 'Total - Sex' | 1               | '01-05 Specialized middle management ...    | 13                 | NaN                | 650205              | 632665                   | 17540                  |
| 14              | 'Total - Highest certificate, d... | 1           | 1                  | 'Total - Age' | 1             | 'Total - Sex' | 1               | '011 Administrative services managers'      | 14                 | NaN                | 178340              | 172830                   | 5515                   |
| 15              | 'Total - Highest certificate, d... | 1           | 1                  | 'Total - Age' | 1             | 'Total - Sex' | 1               | '0111 Financial managers'                   | 15                 | NaN                | 74525               | 72700                    | 1825                   |

**Figure S1. Dataset layout.** Screenshots were taken in MATLAB of the final dataset layout of the Canadian COVID19 dataset (A), Canadian population demographics (B), and Canadian workforce demographics (C).

**Region:**

- Atlantic (New Brunswick, Nova Scotia, Prince Edward Island, Newfoundland and Labrador)
- Quebec
- Ontario and Nunavut
- Prairies (Alberta, Saskatchewan, and Manitoba) and the Northwest Territories
- British Columbia and Yukon

**Episode week:** The episode date is created from the earliest date available from the following series: Symptom Onset Date, Specimen Collection Date, and Laboratory Testing Date.

**Sex:** Male, Female, Not Stated

**Age groups:** 0-19, 20-29, 30-39, 40-49, 50-59, 60-69, 70-79, 80+

**Occupation:**

- Health care worker
- School or daycare worker/attendee
- Long term care resident
- Other
- Not stated

**Asymptomatic:** Yes, No, Not Stated

**Week of symptom onset:** 0-56, 99 (Not Stated)

**Symptoms:** Yes, No, Not Stated

- Cough
- Fever
- Chills
- Sore throat
- Runny nose
- Shortness of breath
- Nausea
- Headache
- Weakness
- Pain
- Irritability
- Diarrhea
- Other

**Hospitalization status:**

- Hospitalized and in Intensive care unit
- Hospitalized, but not in intensive care unit
- Not hospitalized
- Not Stated/Unknown

**Recovered:** Yes, No, Not Stated

**Recovery week:** 0-56, 99 (Not Stated)

**Death:** Yes, No, Not Stated

**Transmission:**

- Domestic acquisition - Contact of COVID case, contact with traveller, or unknown source
- International travel
- Not stated

Figure S2. Summary of COVID-19 dataset parameters and potential values.

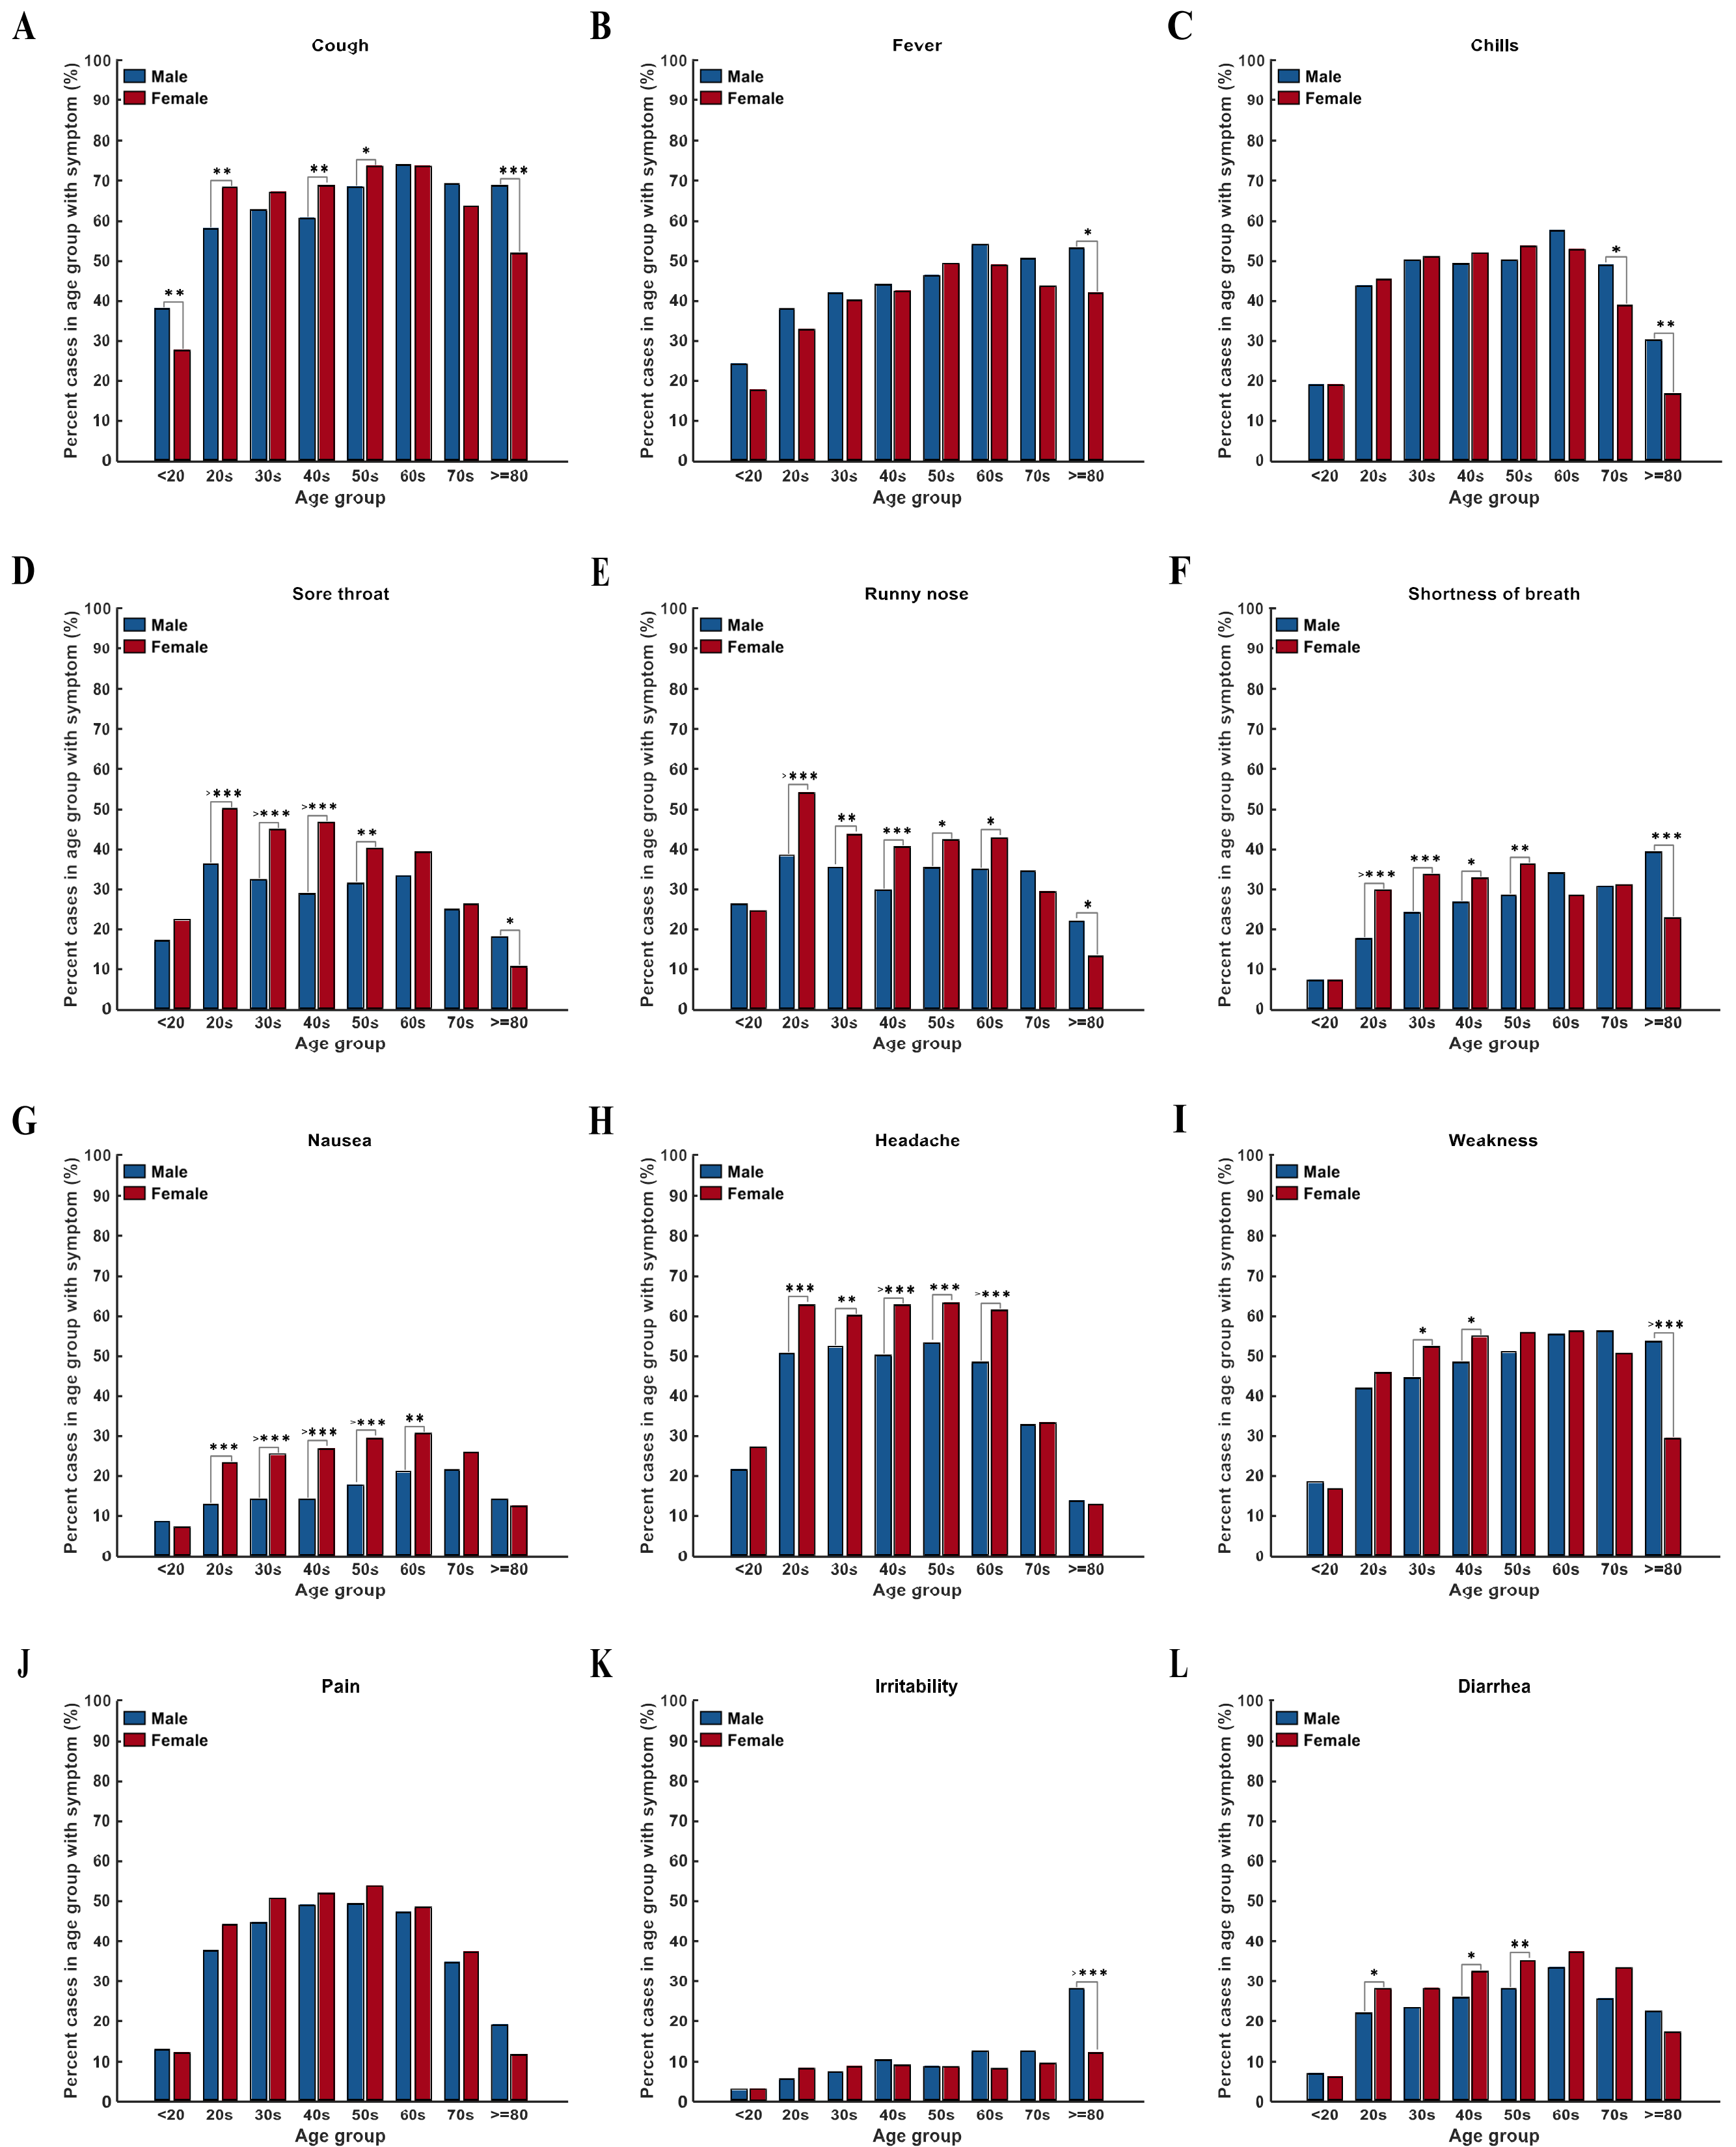

**Figure S3. Age, sex, and symptom segregated COVID-19 cases.** Data represent percentage of cases with symptom relative to total closed cases per sex in each age group. Data were sampled from the 'A/Symptomatic, Closed cases' group and analyzed with Fisher's Exact Test. \* $p < 0.05$ , \*\* $p < 0.01$ , \*\*\* $p < 0.001$ , >\*\*\* $p < 0.0001$ .
